# Supplementary material for: Monetary values estimates of solvent emissions
Source: Royal Society of Chemistry journal article supplement (doi:10.1039/d0gc03210g), 2020-01-01
Supplement: d0gc03210g2.zip [file d0gc03210g2.zip]

## Sheet: Total impact value calculation
				From molecular strucutre	From Level I multimedia model	From Level I multimedia model	From Level I multimedia model	From Level I multimedia model		From MSDS	From literature	From literature	From literature				Needs to be estimated													From MSDS or from literature	From MSDS or from literature				From molecular structure	From molecular structure	From molecular structure
			CAS Number	Molar weight [g/mol]	Air [%]	Water [%]	Soil [%]	Sediment [%]	SUM (to check)	density [g cm-3]	GWP100	POCP (AOT40)	Particle formation potential	YLL via climate change	YLL via oxidants	YLL via secondary particles	YLL via cancer	Under nutrition via climate change	Working capacity via climate change	Diarrhea via climate change	YLD via secondary particles	crop loss via climate change	crop loss via oxidants	meat production capacity via climate change	Drinking water via climate change	Biodiversity via climate change	Impact value for emission to air [$/kg]	Impact value for VOC emission to air [$/l]	2019 Impact value for VOC emission to air [$/l]	Oral LD50 towards rodends [mg/kg of body mass]	Biodegradability half life [days]	Impact value in relation to EtOH	Impact Value DRINK	Formula	Number of C atoms	Number of H atoms	Number of O atoms	Moles O2 to oxidise compound	kg of O2 that oxidize kg of solvent	Impact value for BOD [$/kg solvent]	Impact value for BOD [$/l]	2019 Impact value for solvent emmission to water [$/l]	TOTAL Impact Value [$/l]
hydrocarbons	1	pentane	109-66-0	72	99.993	0.002	0.005	0	100	0.62	3.9	0.4	0	7.332e-06	6.06087e-06	0		6.708e-06	0.017667	1.1544e-09	0	0.05538	0.104348	0.0014508	0.0035334	6.591e-16	2.06363	1.27945	1.31783	5000	3	5450	2.19493	C5H12	5	12	0	8	1.77778	0.000625778	0.000387982	2.19532	1.31778
	2	hexane	110-54-3	86	99.97	0	0.03	0	100	0.65	3.9	0.4	0	7.332e-06	6.06087e-06	0		6.708e-06	0.017667	1.1544e-09	0	0.05538	0.104348	0.0014508	0.0035334	6.591e-16	2.06363	1.34136	1.3816	20000	1	-8059	0.03	C6H14	6	14	0	9.5	1.76744	0.00062214	0.000404391	0.0304044	1.38118
	3	cyclohexane	110-82-7	84	99.89	0.03	0.08	0	100	0.77	3.9	0.28	0.013	7.332e-06	4.24261e-06	1.742e-05		6.708e-06	0.017667	1.1544e-09	8.008e-07	0.05538	0.0730435	0.0014508	0.0035334	6.591e-16	3.81075	2.93428	3.02231	6240	28	4333.26	16.2883	C6H12	6	12	0	9	1.71429	0.000603429	0.00046464	16.2888	3.02387
	4	heptane	142-82-5	100	99.95	0	0.05	0	100	0.68	3.9	0.35	0.0054	7.332e-06	5.30326e-06	7.236e-06		6.708e-06	0.017667	1.1544e-09	3.3264e-07	0.05538	0.0913043	0.0014508	0.0035334	6.591e-16	2.78909	1.89658	1.95348	5000	7	5450	5.12151	C7H16	7	16	0	11	1.76	0.00061952	0.000421274	5.12193	1.9525
	5	octane	111-65-9	114	99.73	0	0.26	0.01	100	0.7	3.9	0.34	0.0757	7.332e-06	5.15174e-06	0.000101438		6.708e-06	0.017667	1.1544e-09	4.66312e-06	0.05538	0.0886957	0.0014508	0.0035334	6.591e-16	13.3217	9.32519	9.60494	7500	28	3198.5	12.0229	C8H18	8	18	0	12.5	1.75439	0.000617544	0.000432281	12.0233	9.57901
	6	nonane	111-84-2	128	99.61	0	0.38	0.01	100	0.72	3.9	0.34	0.1822	7.332e-06	5.15174e-06	0.000244148		6.708e-06	0.017667	1.1544e-09	1.12235e-05	0.05538	0.0886957	0.0014508	0.0035334	6.591e-16	29.3036	21.0986	21.7316	7500	28	3198.5	12.0229	C9H20	9	10	0	11.5	1.4375	0.000506	0.00036432	12.0232	21.6468
	7	decane	124-18-5	142	74.11	0.03	25.3	0.56	100	0.73	3.9	0.36	0.2687	7.332e-06	5.45478e-06	0.000360058		6.708e-06	0.017667	1.1544e-09	1.65519e-05	0.05538	0.093913	0.0014508	0.0035334	6.591e-16	42.3182	30.8923	31.8191	7500	28	3198.5	12.0229	C10H22	10	22	0	15.5	1.74648	0.000614761	0.000448775	12.0233	23.5847
	8	undecane	1120-21-4	156	73.64	0	25.78	0.58	100	0.74	3.9	0.36	0.3699	7.332e-06	5.45478e-06	0.000495666		6.708e-06	0.017667	1.1544e-09	2.27858e-05	0.05538	0.093913	0.0014508	0.0035334	6.591e-16	57.5048	42.5536	43.8302	7500	28	3198.5	12.0229	C11H24	11	24	0	17	1.74359	0.000613744	0.00045417	12.0233	32.2765
	9	dodecane	112-40-3	170	40.44	0	58.26	1.3	100	0.75	3.9	0.33	0.4834	7.332e-06	5.00022e-06	0.000647756		6.708e-06	0.017667	1.1544e-09	2.97774e-05	0.05538	0.086087	0.0014508	0.0035334	6.591e-16	74.4863	55.8647	57.5406	7500	7	3198.5	3.00571	C12H26	12	26	0	18.5	1.74118	0.000612894	0.000459671	3.00617	23.2694
	10	benzene	71-43-2	78	98.67	0.846	0.473	0.011	100	0.88	4.2	0.1	0.37	7.896e-06	1.51522e-06	0.000537117	5.13e-06	7.224e-06	0.019026	1.2432e-09	2.2792e-05	0.05964	0.026087	0.0015624	0.0038052	7.098e-16	62.1578	54.6989	56.3398	320	6	9664.81	7.7848	C6H6	6	6	0	7.5	1.53846	0.000541538	0.000476554	7.78528	55.6564
	11	toluene	108-88-3	92	98.99	0.74	0.26	0.01	100	0.87	4.2	0.44	0.327	7.896e-06	6.66696e-06	0.000490344		7.224e-06	0.019026	1.2432e-09	2.01432e-05	0.05964	0.114783	0.0015624	0.0038052	7.098e-16	56.8944	49.4981	50.9831	5000	3	5450	2.19493	C7H8	7	8	0	9	1.56522	0.000550957	0.000479332	2.19541	50.4844
	12	o-xylene	95-47-6	106	96.99	1.37	1.6	0.04	100	0.879	4.2	0.78	0.33	7.896e-06	1.18187e-05	0.000488263		7.224e-06	0.019026	1.2432e-09	2.0328e-05	0.05964	0.203478	0.0015624	0.0038052	7.098e-16	57.2685	50.339	51.8492	3567	4	6740.56	3.61959	C8H10	8	10	0	10.5	1.58491	0.000557887	0.000490382	3.62008	50.3381
	13	m-xylene	108-38-3	106	97.72	0.94	1.31	0.03	100	0.868	4.2	0.86	0.3236	7.896e-06	1.30309e-05	0.000478793		7.224e-06	0.019026	1.2432e-09	1.99338e-05	0.05964	0.224348	0.0015624	0.0038052	7.098e-16	56.3483	48.9103	50.3776	4988	24	5460.81	17.5943	C8H10	8	10	0	10.5	1.58491	0.000557887	0.000484246	17.5948	49.3944
	14	p-xylene	106-42-3	106	97.97	0.91	1.1	0.02	100	0.88	4.2	0.72	0.139	7.896e-06	1.09096e-05	0.000205662		7.224e-06	0.019026	1.2432e-09	8.5624e-06	0.05964	0.187826	0.0015624	0.0038052	7.098e-16	25.6498	22.5718	23.2489	3910	7	6431.65	6.04399	C8H10	8	10	0	10.5	1.58491	0.000557887	0.00049094	6.04448	22.832
alcohols	15	methanol	67-56-1	32	9.83	90.15	0.02	0	100	0.79	1.07	0.13	0.04	2.0116e-06	1.96978e-06	0.000142933		1.8404e-06	0.0048471	3.1672e-10	2.464e-06	0.015194	0.033913	0.00039804	0.00096942	1.8083e-16	16.1678	12.7726	13.1558	3500	1	6800.9	0.912998	C1H4O1	1	4	1	1.5	0.75	0.000264	0.00020856	0.913206	2.11647
	16	ethanol	64-17-5	46	6.59	93.37	0.04	0	100	0.78	2.3	0.34	0.04	4.324e-06	5.15174e-06	0.000102733		3.956e-06	0.010419	6.808e-10	2.464e-06	0.03266	0.0886957	0.0008556	0.0020838	3.887e-16	12.6569	9.87239	10.1686	10900	2	136.46	0.0366386	C2H6O1	2	6	1	3	1.04348	0.000367304	0.000286497	0.0369251	0.704585
	17	propanol	71-23-8	60	10.73	89.13	0.14	0	100	0.8	2.7	0.48	0.04	5.076e-06	7.27304e-06	8.93333e-05		4.644e-06	0.012231	7.992e-10	2.464e-06	0.03834	0.125217	0.0010044	0.0024462	4.563e-16	11.6019	9.28151	9.55996	2200	3	7971.68	3.21051	C3H8O1	3	8	1	4.5	1.2	0.0004224	0.00033792	3.21085	3.88761
	18	isopropanol	67-63-0	60	14.62	85.29	0.09	0	100	0.78	2.7	0.18	0.04	5.076e-06	2.72739e-06	8.93333e-05		4.644e-06	0.012231	7.992e-10	2.464e-06	0.03834	0.0469565	0.0010044	0.0024462	4.563e-16	11.0926	8.65222	8.91178	5045	1	5409.47	0.726203	C3H8O1	3	8	1	4.5	1.2	0.0004224	0.000329472	0.726533	1.92256
	19	butanol	71-36-3	74	15.25	84.17	0.57	0.01	100	0.81	2.9	0.52	0.04	5.452e-06	7.87913e-06	8.26333e-05		4.988e-06	0.013137	8.584e-10	2.464e-06	0.04118	0.135652	0.0010788	0.0026274	4.901e-16	11.0235	8.929	9.19687	790	7	9241.53	8.6845	C4H10O1	4	10	1	6	1.2973	0.000456649	0.000369885	8.68487	8.71258
	20	isobutanol	67-63-0	74	46.97	52.97	0.06	0	100	0.78	2.9	0.36	0.04	5.452e-06	5.45478e-06	8.26333e-05		4.988e-06	0.013137	8.584e-10	2.464e-06	0.04118	0.093913	0.0010788	0.0026274	4.901e-16	10.7518	8.38642	8.63801	2460	7	7737.52	7.27115	C4H10O1	4	10	1	6	1.2973	0.000456649	0.000356186	7.27151	7.90899
	21	sec-butyl alcohol	78-92-2	74	14.06	85.61	0.32	0.01	100	0.81	2.9	0.4	0.04	5.452e-06	6.06087e-06	8.26333e-05		4.988e-06	0.013137	8.584e-10	2.464e-06	0.04118	0.104348	0.0010788	0.0026274	4.901e-16	10.8197	8.76398	9.0269	2193	7	7977.98	7.49712	C4H10O1	4	10	1	6	1.2973	0.000456649	0.000369885	7.49749	7.68778
	22	tert-butyl alcohol	76-65-0	74	27.36	72.49	0.14	0.01	100	0.78	2.9	0.02	0.04	5.452e-06	3.03043e-07	8.26333e-05		4.988e-06	0.013137	8.584e-10	2.464e-06	0.04118	0.00521739	0.0010788	0.0026274	4.901e-16	10.1746	7.93619	8.17428	2743	7	7482.65	7.03164	C4H10O1	4	10	1	6	1.2973	0.000456649	0.000356186	7.032	7.33398
	23	o-cresol	95-45-7	108	4.37	88.02	7.44	0.17	100	1.03	2.9	0.19	0.1483	5.452e-06	2.87891e-06	0.000198722		4.988e-06	0.013137	8.584e-10	9.13528e-06	0.04118	0.0495652	0.0010788	0.0026274	4.901e-16	23.6068	24.315	25.0444	1350	2	8737.19	2.34588	C7H8O	7	8	1	8.5	1.25926	0.000443259	0.000456557	2.34633	3.15968
ethers	24	diethyl ether	60-29-7	74	93.66	6.3	0.04	0	100	0.71	2.9	0.46	0	5.452e-06	6.97e-06	0		4.988e-06	0.013137	8.584e-10	0	0.04118	0.12	0.0010788	0.0026274	4.901e-16	1.81047	1.28544	1.324	1211	1	8862.37	1.18974	C4H10O1	4	10	1	6	1.2973	0.000456649	0.000324221	1.19007	1.31503
	25	MTBE	1634-04-4	88	91.99	7.95	0.06	0	100	0.75	3.1	0.264	0	5.828e-06	4.00017e-06	0		5.332e-06	0.014043	9.176e-10	0	0.04402	0.0688696	0.0011532	0.0028086	5.239e-16	1.54873	1.16155	1.19639	3665	2	6652.3	1.7861	C5H12O1	5	12	1	7.5	1.36364	0.00048	0.00036	1.78646	1.24259
aldehydes	26	ethanal	75-07-0	44	80.53	19.42	0.05	0	100	0.78	2.5	0.55	0	4.7e-06	8.3337e-06	0		4.3e-06	0.011325	7.4e-10	0	0.0355	0.143478	0.00093	0.002265	4.225e-16	1.82126	1.42058	1.4632	1930	3	8214.84	3.30844	C2H4O1	2	4	1	2.5	0.909091	0.00032	0.0002496	3.30869	1.82086
	27	propanal	123-38-6	58	62.18	37.69	0.13	0	100	0.8	2.8	0.72	0	5.264e-06	1.09096e-05	0		4.816e-06	0.012684	8.288e-10	0	0.03976	0.187826	0.0010416	0.0025368	4.732e-16	2.21637	1.7731	1.82629	1410	11	8683.15	12.8225	C3H6O1	3	6	1	4	1.10345	0.000388414	0.000310731	12.8228	5.96851
	28	butanal	123-72-8	72	85.14	14.76	0.1	0	100	0.81	3	0.7	0	5.64e-06	1.06065e-05	0		5.16e-06	0.01359	8.88e-10	0	0.0426	0.182609	0.001116	0.002718	5.07e-16	2.25342	1.82527	1.88003	2490	5	7710.51	5.17555	C4H8O1	4	8	1	5.5	1.22222	0.000430222	0.00034848	5.17589	2.36462
ketones	29	acetone	67-64-1	58	61.54	38.44	0.02	0	100	0.79	3	0.06	0	5.64e-06	9.0913e-07	0		5.16e-06	0.01359	8.88e-10	0	0.0426	0.0156522	0.001116	0.002718	5.07e-16	1.1669	0.921851	0.949507	5800	3	4729.52	1.90477	C3H6O1	3	6	1	4	1.10345	0.000388414	0.000306847	1.90507	1.31664
	30	2-butanone (MEK)	78-93-3	72	42.02	57.88	0.1	0	100	0.8	3.4	0.32	0	6.392e-06	4.8487e-06	0		5.848e-06	0.015402	1.0064e-09	0	0.04828	0.0834783	0.0012648	0.0030804	5.746e-16	1.7503	1.40024	1.44225	2737	11	7488.06	11.0577	C4H8O1	4	8	1	5.5	1.22222	0.000430222	0.000344178	11.0581	7.00643
	31	2-pentanone	107-87-9	86	43.92	55.7	0.37	0.01	100	0.81	3.1	0.548	0	5.828e-06	8.30339e-06	0		5.332e-06	0.014043	9.176e-10	0	0.04402	0.142957	0.0011532	0.0028086	5.239e-16	2.03087	1.64501	1.69436	3200	7	7071.08	6.64488	C5H10O	5	10	1	7	1.30233	0.000458419	0.000371319	6.64525	4.44557
	32	3-pentanone	96-22-0	86	48.84	50.79	0.36	0.01	100	0.81	3.1	-0.01	0	5.828e-06	-1.51522e-07	0		5.332e-06	0.014043	9.176e-10	0	0.04402	-0.0026087	0.0011532	0.0028086	5.239e-16	1.08356	0.877686	0.904017	2140	7.5	8025.72	8.08069	C5H10O	5	10	1	7	1.30233	0.000458419	0.000371319	8.08106	4.54589
	33	methyl isobutyl ketone	108-10-1	100	73.06	26.37	0.56	0.01	100	0.8	3.4	0.52	0	6.392e-06	7.87913e-06	0		5.848e-06	0.015402	1.0064e-09	0	0.04828	0.135652	0.0012648	0.0030804	5.746e-16	2.08984	1.67187	1.72203	2080	11	8079.75	11.9315	C6H12O	6	12	1	8.5	1.36	0.00047872	0.000382976	11.9319	4.40454
	34	2-hexanone	591-78-6	100	37.57	61.1	1.3	0.03	100	0.81	3.3	0.572	0	6.204e-06	8.66704e-06	0		5.676e-06	0.014949	9.768e-10	0	0.04686	0.149217	0.0012276	0.0029898	5.577e-16	2.14262	1.73552	1.78759	2590	5	7620.45	5.11509	C6H12O	6	12	1	8.5	1.36	0.00047872	0.000387763	5.11548	3.79716
	35	cyclohexanone	108-94-1	98	11.89	87.6	0.5	0.01	100	0.95	3.3	0.529	0	6.204e-06	8.0155e-06	0		5.676e-06	0.014949	9.768e-10	0	0.04686	0.138	0.0012276	0.0029898	5.577e-16	2.06962	1.96614	2.02512	1800	7	8331.92	7.82972	C6H10O	6	10	1	8	1.30612	0.000459755	0.000436767	7.83016	7.10001
Terpenes	36	(R)-(+)-limonene	5989-27-5	136	97.82	0.08	2.05	0.05	100	0.84	3	0.71	0.5884	5.64e-06	1.0758e-05	0.000788456		5.16e-06	0.01359	8.88e-10	3.62454e-05	0.0426	0.185217	0.001116	0.002718	5.07e-16	90.5687	76.0777	78.36	4400	7	5990.36	5.6293	C10H16	10	16	0	14	1.64706	0.000579765	0.000487002	5.62978	76.6563
	37	p-cymene	99-87-6	134	95.41	0.44	4.06	0.09	100	0.86	3	0.7	0.5884	5.64e-06	1.06065e-05	0.000788456		5.16e-06	0.01359	8.88e-10	3.62454e-05	0.0426	0.182609	0.001116	0.002718	5.07e-16	90.5517	77.8745	80.2107	4750	14	5675.15	10.6662	C10H14	10	14	0	13.5	1.61194	0.000567403	0.000487967	10.6667	76.576
	38	α-pinene	80-56-8	136	99.31	0.03	0.65	0.01	100	0.88	3	0.68	0.5884	5.64e-06	1.03035e-05	0.000788456		5.16e-06	0.01359	8.88e-10	3.62454e-05	0.0426	0.177391	0.001116	0.002718	5.07e-16	90.5178	79.6556	82.0453	3700	21	6620.78	18.6652	C10H16	10	16	0	14	1.64706	0.000579765	0.000510193	18.6657	81.4848
	39	β-pinene	127-91-3	136	98.25	0.08	1.63	0.04	100	0.87	3	0.33	0.556	5.64e-06	5.00022e-06	0.00074504		5.16e-06	0.01359	8.88e-10	3.42496e-05	0.0426	0.086087	0.001116	0.002718	5.07e-16	85.0615	74.0035	76.2236	4700	21	5720.18	16.1262	C10H17	10	16	0	14	1.64706	0.000579765	0.000504395	16.1267	74.9026
organic acids	40	formic acid	64-18-6	46	0.48	99.49	0.03	0	100	1.22	1.2	0.03	0	2.256e-06	4.54565e-07	0		2.064e-06	0.005436	3.552e-10	0	0.01704	0.00782609	0.0004464	0.0010872	2.028e-16	0.476946	0.581874	0.599331	1830	1	8304.9	1.1149	C1H2O2	1	2	2	0.5	0.173913	6.12174e-05	7.46852e-05	1.11498	1.11217
	41	acetic acid	64-19-7	60	5.07	94.89	0.04	0	100	1.05	1.8	0.09	0	3.384e-06	1.3637e-06	0		3.096e-06	0.008154	5.328e-10	0	0.02556	0.0234783	0.0006696	0.0016308	3.042e-16	0.791815	0.831406	0.856348	3310	2	6972.01	1.87194	C2H4O2	2	4	2	2	0.533333	0.000187733	0.00019712	1.87214	1.81989
	42	propionic acid	79-19-4	74	3.72	96.1	0.18	0	100	0.99	2.6	0.13	0	4.888e-06	1.96978e-06	0		4.472e-06	0.011778	7.696e-10	0	0.03692	0.033913	0.0009672	0.0023556	4.394e-16	1.14373	1.1323	1.16626	2600	1	7611.44	1.02181	C2H6O2	2	6	2	2.5	0.540541	0.00019027	0.000188368	1.022	1.02553
esters	43	ethyl acetate	141-78-6	88	73.51	26.36	0.13	0	100	0.9	2.5	0.19	0.04	4.7e-06	2.87891e-06	0.000131022		4.3e-06	0.011325	7.4e-10	2.464e-06	0.0355	0.0495652	0.00093	0.002265	4.225e-16	15.5021	13.9519	14.3704	5620	5	4891.63	3.28342	C4H8O2	4	8	2	5	0.909091	0.00032	0.000288	3.28371	11.4293
	44	methyl formate	107-31-3	60	90.11	9.89	0	0	100	0.97	1.8	0.03	0.04	3.384e-06	4.54565e-07	0.000134		3.096e-06	0.008154	5.328e-10	2.464e-06	0.02556	0.00782609	0.0006696	0.0016308	3.042e-16	15.3007	14.8417	15.287	475	2	9525.22	2.55745	C2H4O2	2	4	2	2	0.533333	0.000187733	0.000182101	2.55764	14.028
	45	methyl acetate	79-20-9	74	88.6	11.38	0.02	0	100	0.93	2.2	0.07	0.04	4.136e-06	1.06065e-06	0.000110178		3.784e-06	0.009966	6.512e-10	2.464e-06	0.03124	0.0182609	0.0008184	0.0019932	3.718e-16	12.9601	12.0529	12.4145	7500	4	3198.5	1.71755	C3H6O2	3	6	2	3.5	0.756757	0.000266378	0.000247732	1.7178	11.1947
	46	methyl lactate	27871-49-4	104	0.53	99.46	0.01	0	100	1.09	2	0.006	0.04	3.76e-06	9.0913e-08	5.36e-05		3.44e-06	0.00906	5.92e-10	2.464e-06	0.0284	0.00156522	0.000744	0.001812	3.38e-16	6.72282	7.32787	7.54771	7500	7	3198.5	3.00571	C4H8O3	4	8	3	4.5	0.692308	0.000243692	0.000265625	3.00598	3.02975
chlorinated	47	dichloromethane	75-09-2	85	97.51	2.45	0.04	0	100	1.33	11	0.03	0	2.068e-05	4.54565e-07	0	2.57e-06	1.892e-05	0.04983	3.256e-09	0	0.1562	0.00782609	0.004092	0.009966	1.859e-15	4.23124	5.62754	5.79637	985	10	9065.91	12.1707	CH2Cl2	1	2	0	1.5	0.282353	9.93882e-05	0.000132186	12.1708	5.95022
	48	chloroform	67-66-3	119	98.66	1.25	0.09	0	100	1.49	20	0	0	3.76e-05	0	0	2.57e-06	3.44e-05	0.0906	5.92e-09	0	0.284	0	0.00744	0.01812	3.38e-15	7.37542	10.9894	11.3191	300	28	9682.82	36.3968	CH1Cl3	1	1	0	1.25	0.168067	5.91597e-05	8.81479e-05	36.3969	11.6223
	49	carbon tetrachloride	56-23-5	154	99.76	0.17	0.07	0	100	1.6	2019	0.03	0	0.00379572	4.54565e-07	0	2.57e-06	0.00347268	9.14607	5.97624e-07	0	28.6698	0.00782609	0.751068	1.82921	3.41211e-13	717.097	1147.36	1181.78	8	250	9945.8	333.797	CCl4	1	0	0	1	0.103896	3.65714e-05	5.85143e-05	333.797	1179.51
	50	trichloroethene	79-01-6	131	99.32	0.56	0.12	0	100	1.45	4.5	0.29	0	8.46e-06	4.39413e-06	0	5.13e-06	7.74e-06	0.020385	1.332e-09	0	0.0639	0.0756522	0.001674	0.004077	7.605e-16	2.63914	3.82676	3.94156	4920	180	5522.05	133.437	C2H1Cl3	2	1	0	2.25	0.274809	9.67328e-05	0.000140263	133.437	4.662
	51	tetrachloroethene	127-18-4	166	99.58	0.31	0.11	0	100	1.62	4.5	0.01	0	8.46e-06	1.51522e-07	0	2.57e-06	7.74e-06	0.020385	1.332e-09	0	0.0639	0.0026087	0.001674	0.004077	7.605e-16	1.8897	3.06131	3.15315	2629	230	7585.32	234.21	C2Cl4	2	0	0	2	0.192771	6.78554e-05	0.000109926	234.21	3.86596
	52	1,1,1-trichloroethane	71-55-6	133	99.61	0.31	0.08	0	100	1.34	193	-0.01	0	0.00036284	-1.51522e-07	0		0.00033196	0.87429	5.7128e-08	0	2.7406	-0.0026087	0.071796	0.174858	3.2617e-14	68.5005	91.7907	94.5444	5660	250	4855.6	162.962	C2H3Cl3	2	3	0	2.75	0.330827	0.000116451	0.000156045	162.962	94.6809
	53	1-pentanol	71-41-0	88.15	87.56	5.07	7.21	0.16	100	0.811	2.59	0.29	0.05	4.8692e-06	4.39413e-06	6.7e-05		4.4548e-06	0.0117327	7.6664e-10	3.08e-06	0.036778	0.0756522	0.00096348	0.00234654	4.3771e-16	8.91507	7.23012	7.44702	3645	1	6670.31	0.895467		5	12	1	7.5	1.36132	0.000479183	0.000388618	0.895855	6.56603
	54	1-hexanol	111-27-3	102.17	99.21	0.17	0.6	0.02	100	0.814	2.59	0.29	0.05	4.8692e-06	4.39413e-06	6.7e-05		4.4548e-06	0.0117327	7.6664e-10	3.08e-06	0.036778	0.0756522	0.00096348	0.00234654	4.3771e-16	8.91507	7.25687	7.47457	3000	1.7	7251.2	1.65486		6	14	1	9	1.40942	0.000496114	0.000403837	1.65527	7.41834
	55	1-heptanol	111-701-6	116.2	90.99	0.9	7.93	0.18	100	0.822	2.59	0.29	0.05	4.8692e-06	4.39413e-06	6.7e-05		4.4548e-06	0.0117327	7.6664e-10	3.08e-06	0.036778	0.0756522	0.00096348	0.00234654	4.3771e-16	8.91507	7.32819	7.54803	5500	1.14	4999.7	0.76516		7	16	1	10.5	1.44578	0.000508916	0.000418329	0.765578	6.87484
	56	1-octanol	111-87-5	130.23	1.25	2.69	93.97	2.09	100	0.827	2.59	0.29	0.05	4.8692e-06	4.39413e-06	6.7e-05		4.4548e-06	0.0117327	7.6664e-10	3.08e-06	0.036778	0.0756522	0.00096348	0.00234654	4.3771e-16	8.91507	7.37276	7.59394	7500	1	3198.5	0.429388		8	18	1	12	1.47431	0.000518959	0.000429179	0.429817	0.106486
	57	t-amyl alcohol	75-85-4	88.15	94.6	4.05	1.32	0.03	100	0.805	2.59	0.29	0.05	4.8692e-06	4.39413e-06	6.7e-05		4.4548e-06	0.0117327	7.6664e-10	3.08e-06	0.036778	0.0756522	0.00096348	0.00234654	4.3771e-16	8.91507	7.17663	7.39193	5200	3	5269.88	2.12239		5	12	1	7.5	1.36132	0.000479183	0.000385742	2.12278	7.07874
	58	isobutyl acetate	110-19-0	116.16	98.62	0.11	1.24	0.03	100	0.867	2.125	0.074	0.04	3.995e-06	1.12126e-06	5.36e-05		3.655e-06	0.00962625	6.29e-10	2.464e-06	0.030175	0.0193043	0.0007905	0.00192525	3.59125e-16	6.88264	5.96725	6.14626	13413	4	136	0.0730301		6	12	2	8	1.10193	0.000387879	0.000336291	0.0733664	6.06152
	59	amyl acetate	628-63-7	130.18	92.77	0.59	6.5	0.14	100	0.876	2.125	0.074	0.04	3.995e-06	1.12126e-06	5.36e-05		3.655e-06	0.00962625	6.29e-10	2.464e-06	0.030175	0.0193043	0.0007905	0.00192525	3.59125e-16	6.88264	6.02919	6.21006	6500	4	4099.1	2.20116		7	14	2	9.5	1.16761	0.000411	0.000360036	2.20152	5.77407
	60	isoamyl acetate	123-92-2	130.18	96.19	0.13	3.6	0.08	100	0.876	2.125	0.074	0.04	3.995e-06	1.12126e-06	5.36e-05		3.655e-06	0.00962625	6.29e-10	2.464e-06	0.030175	0.0193043	0.0007905	0.00192525	3.59125e-16	6.88264	6.02919	6.21006	7500	5	3198.5	2.14694		7	14	2	9.5	1.16761	0.000411	0.000360036	2.1473	5.97625
	61	2-ethylhexyl acetate	103-09-3	172.26	96.85	0	3.08	0.07	100	0.87	2.125	0.074	0.04	3.995e-06	1.12126e-06	5.36e-05		3.655e-06	0.00962625	6.29e-10	2.464e-06	0.030175	0.0193043	0.0007905	0.00192525	3.59125e-16	6.88264	5.98789	6.16753	5140	3	5323.92	2.14415		10	20	2	14	1.30036	0.000457727	0.000398222	2.14455	5.97325
	62	diethyl carbonate	105-58-8	118.13	99.81	0.1	0.09	0	100	0.975	2.125	0.074	0.04	3.995e-06	1.12126e-06	5.36e-05		3.655e-06	0.00962625	6.29e-10	2.464e-06	0.030175	0.0193043	0.0007905	0.00192525	3.59125e-16	6.88264	6.71057	6.91189	4876	3	5561.67	2.23991		5	10	3	6	0.812664	0.000286058	0.000278906	2.24019	6.90099
	63	methyl oleate	112-62-9	296.49	83.3	0	16.34	0.36	100	0.874	2.125	0.074	0.04	3.995e-06	1.12126e-06	5.36e-05		3.655e-06	0.00962625	6.29e-10	2.464e-06	0.030175	0.0193043	0.0007905	0.00192525	3.59125e-16	6.88264	6.01542	6.19589	3000	3	7251.2	2.92035		19	36	2	27	1.45705	0.000512881	0.000448258	2.92079	5.16117
	64	dimethyl succinate	106-65-0	146.14	41.1	52.28	6.48	0.14	100	1.12	2.125	0.074	0.04	3.995e-06	1.12126e-06	5.36e-05		3.655e-06	0.00962625	6.29e-10	2.464e-06	0.030175	0.0193043	0.0007905	0.00192525	3.59125e-16	6.88264	7.70855	7.93981	7500	3	3198.5	1.28816		6	10	4	6.5	0.711646	0.0002505	0.000280559	1.28844	3.93686
	65	glycerol diacetate	25395-31-7	176.17	72.73	26.92	0.34	0.01	100	1.17	2.125	0.074	0.04	3.995e-06	1.12126e-06	5.36e-05		3.655e-06	0.00962625	6.29e-10	2.464e-06	0.030175	0.0193043	0.0007905	0.00192525	3.59125e-16	6.88264	8.05268	8.29426	8500	3	2297.9	0.925456		7	12	5	7.5	0.68116	0.000239768	0.000280529	0.925736	6.28163
	66	glycerol triacetate	102-76-1	218.2	2.03	89.02	8.76	0.19	100	1.158	2.125	0.074	0.04	3.995e-06	1.12126e-06	5.36e-05		3.655e-06	0.00962625	6.29e-10	2.464e-06	0.030175	0.0193043	0.0007905	0.00192525	3.59125e-16	6.88264	7.97009	8.2092	3000	3	7251.2	2.92035		9	14	6	9.5	0.696609	0.000245206	0.000283949	2.92063	2.76659
	67	polarclean (5-(dimethylamino)-2-methyl-5-oxopentanoate)	1174627-68-9	187.24	0.01	87.79	11.93	0.27	100	1.039	2.125	0.074	0.04	3.995e-06	1.12126e-06	5.36e-05		3.655e-06	0.00962625	6.29e-10	2.464e-06	0.030175	0.0193043	0.0007905	0.00192525	3.59125e-16	6.88264	7.15106	7.36559	3000	3	7251.2	2.92035		9	17	3	11.75	1.00406	0.000353429	0.000367212	2.92071	2.56483
	68	lactic acid	50-21-5	90.08	0.01	98.88	1.09	0.02	100	1.209	1.87	0.083	0	3.5156e-06	1.25763e-06	0		3.2164e-06	0.0084711	5.5352e-10	0	0.026554	0.0216522	0.00069564	0.00169422	3.1603e-16	0.804782	0.972982	1.00217	3543	3	6762.17	2.7234		3	6	3	3	0.53286	0.000187567	0.000226768	2.72362	2.69322
	69	furfural	98-01-1	96.08	97.34	2.32	0.33	0.01	100	1.16	2.77	0.66	0	5.2076e-06	1.00004e-05	0		4.7644e-06	0.0125481	8.1992e-10	0	0.039334	0.172174	0.00103044	0.00250962	4.6813e-16	2.10386	2.44048	2.51369	108	2	9855.74	2.6462		5	4	2	5	0.832639	0.000293089	0.000339983	2.64654	2.50823
	70	cyrene (dihydrolevoglucosenone)	53716-82-8	128.13	11.43	88.42	0.15	0	100	1.25	3	0.605	0.58	5.64e-06	9.16707e-06	0.0007772		5.16e-06	0.01359	8.88e-10	3.5728e-05	0.0426	0.157826	0.001116	0.002718	5.07e-16	89.1299	111.412	114.755	3000	3	7251.2	2.92035		6	8	3	6.5	0.811676	0.00028571	0.000357137	2.9207	15.699
	71	butylpyrrolidinone	3470-98-2	141.21	4.63	46.44	47.87	1.06	100	0.96	3.22	0.36	0	6.0536e-06	5.45478e-06	0		5.5384e-06	0.0145866	9.5312e-10	0	0.045724	0.093913	0.00119784	0.00291732	5.4418e-16	1.75431	1.68414	1.73466	1500	3	8602.1	3.46441		8	15	1	11.25	1.2747	0.000448693	0.000430746	3.46484	1.68939
